# Supplementary material for: Patterns of Diversity of Fusarium Fungi Contaminating Soybean Grains
Source: MDPI journal article supplement (doi:10.3390/toxins13120884), 2021-12-10
Supplement: s1 [file s1]

# Supplementary Materials: Patterns of Diversity of *Fusarium* Fungi Contaminating Soybean Grains

Maciej Żelechowski, Tomasz Molcan, Katarzyna Bilka, Kamil Myszczyński, Jacek Olszewski, Krzysztof Karpiesiuk, Joanna Wyrębek and Tomasz Kulik

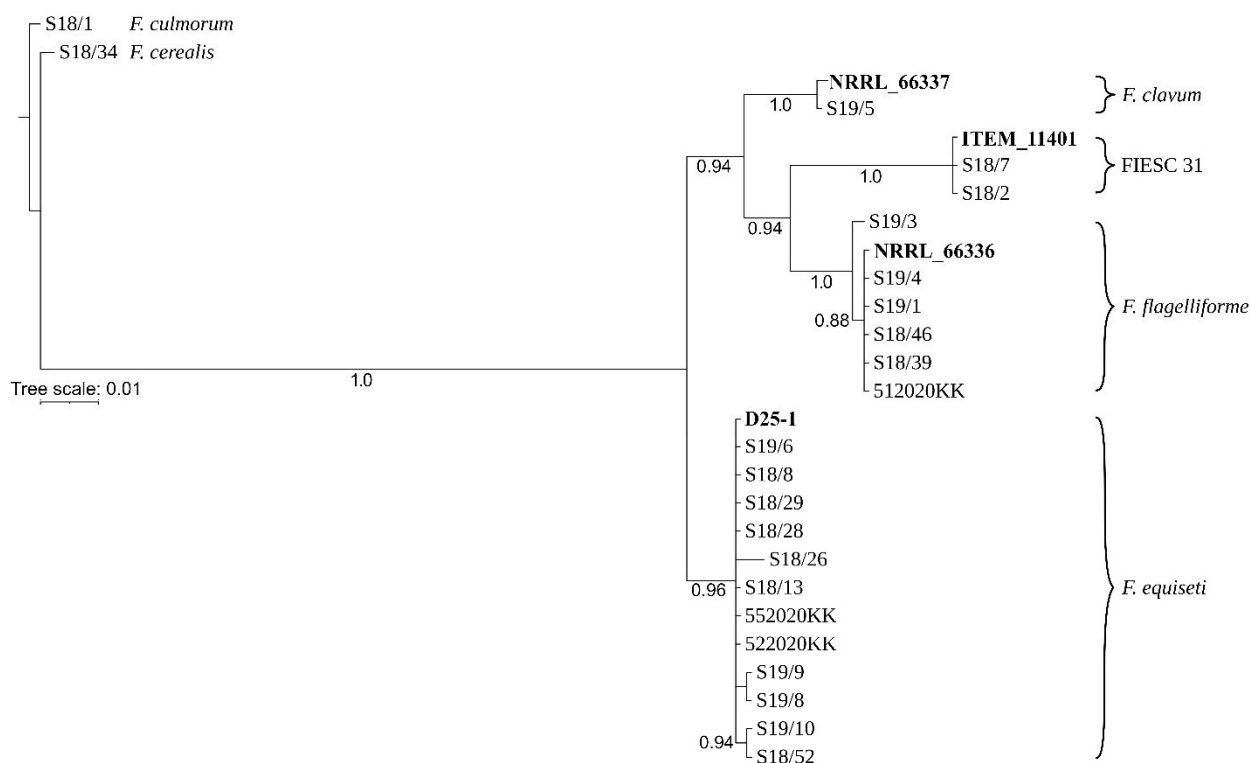

**Figure S1.** Bayesian inference phylogeny from *tef-1α* sequences of isolates from Equiseti clade.

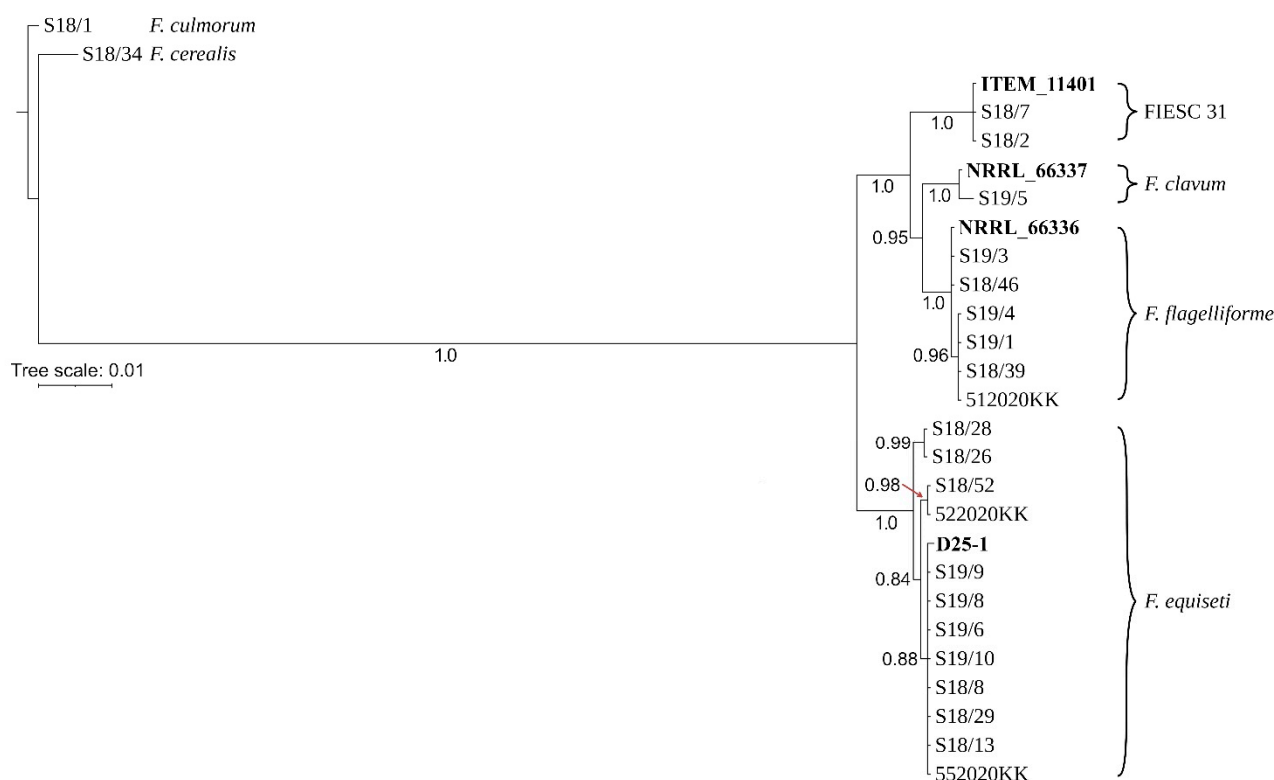

**Figure S2.** Bayesian inference phylogeny from *rpb1* sequences of isolates from Equiseti clade.

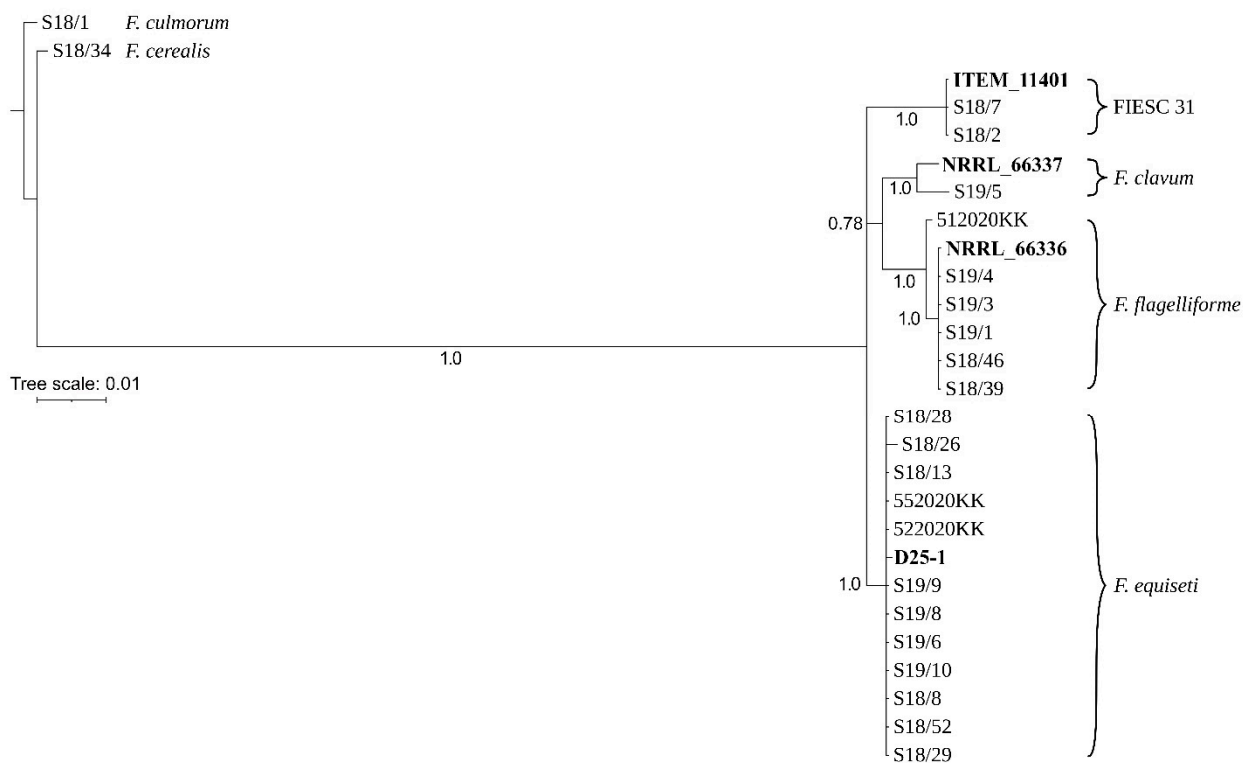

**Figure S3.** Bayesian inference phylogeny from *rpb2* sequences of isolates from Equiseti clade.

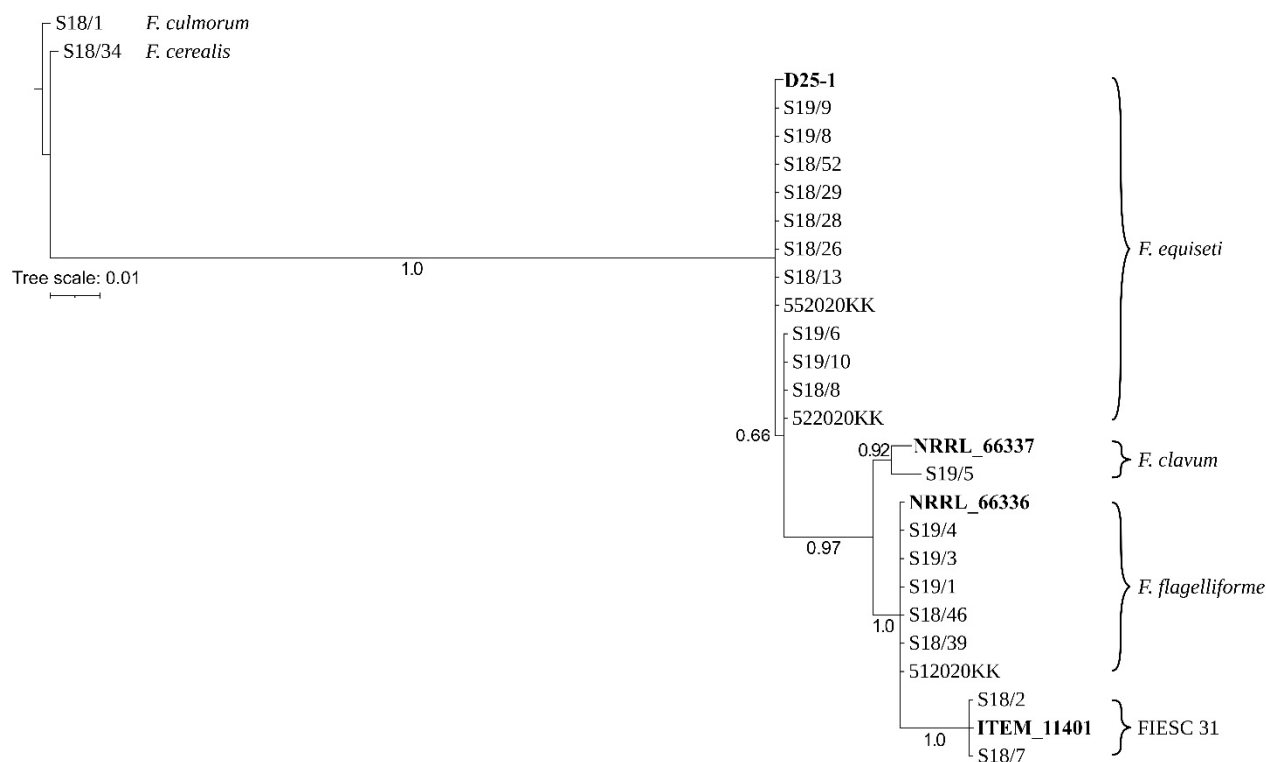

**Figure S4.** Bayesian inference phylogeny from *cam* sequences of isolates from Equiseti clade.

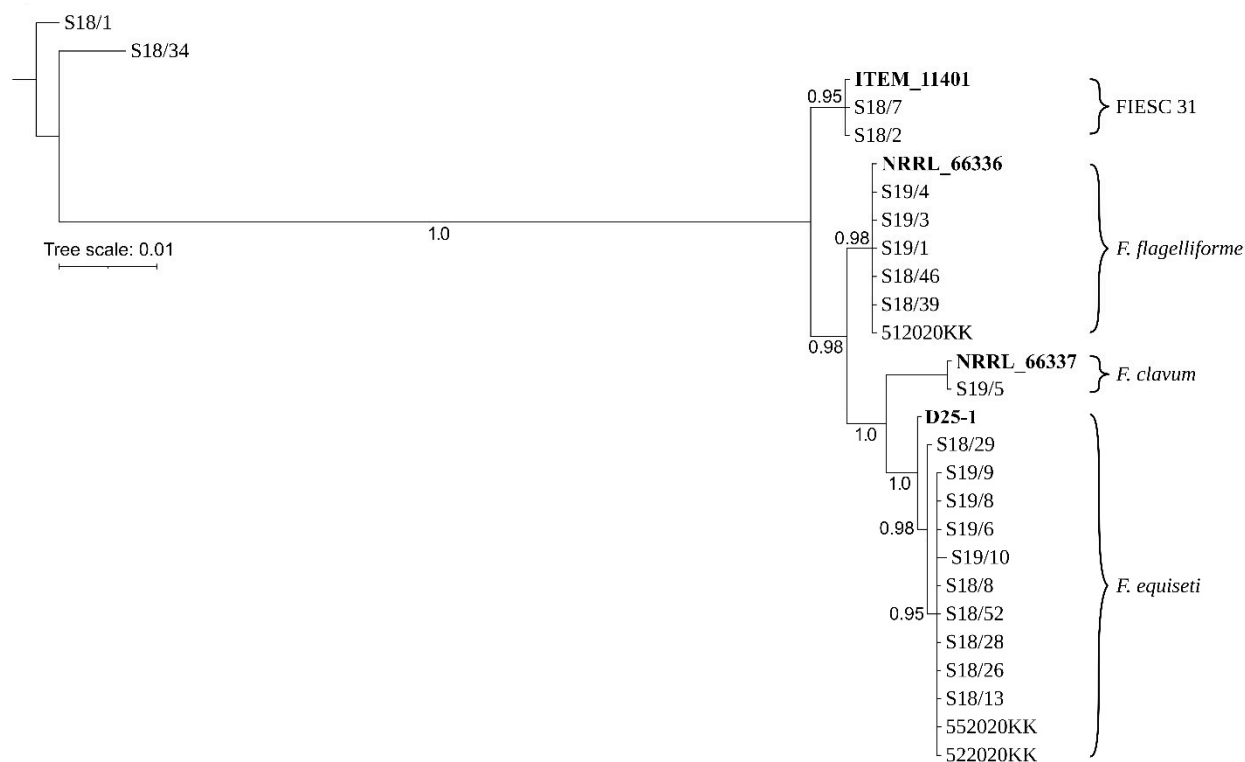

**Figure S5.** Bayesian inference phylogeny from *tub2* sequences of isolates from Equiseti clade.

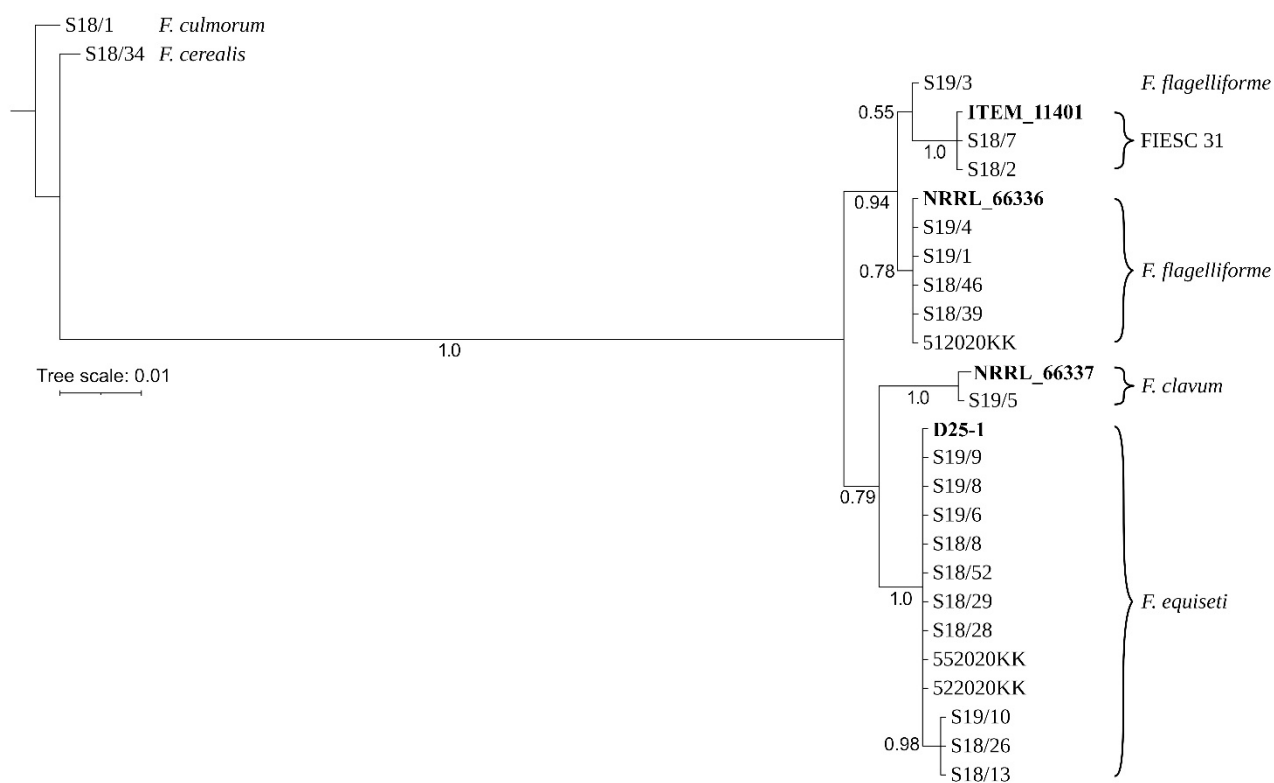

**Figure S6.** Bayesian inference phylogeny from *top1* sequences of isolates from Equiseti clade.

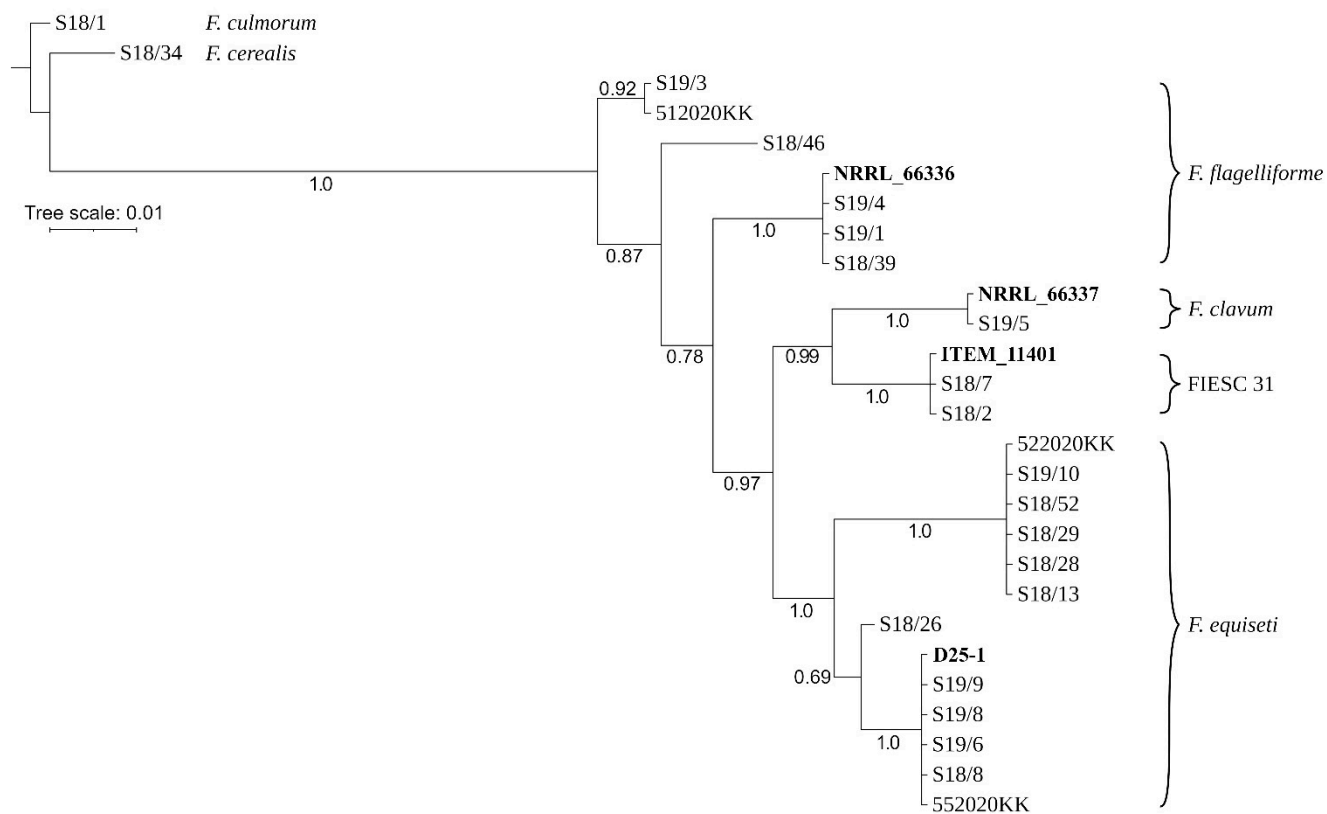

**Figure S7.** Bayesian inference phylogeny from *pgk* sequences of isolates from Equiseti clade.

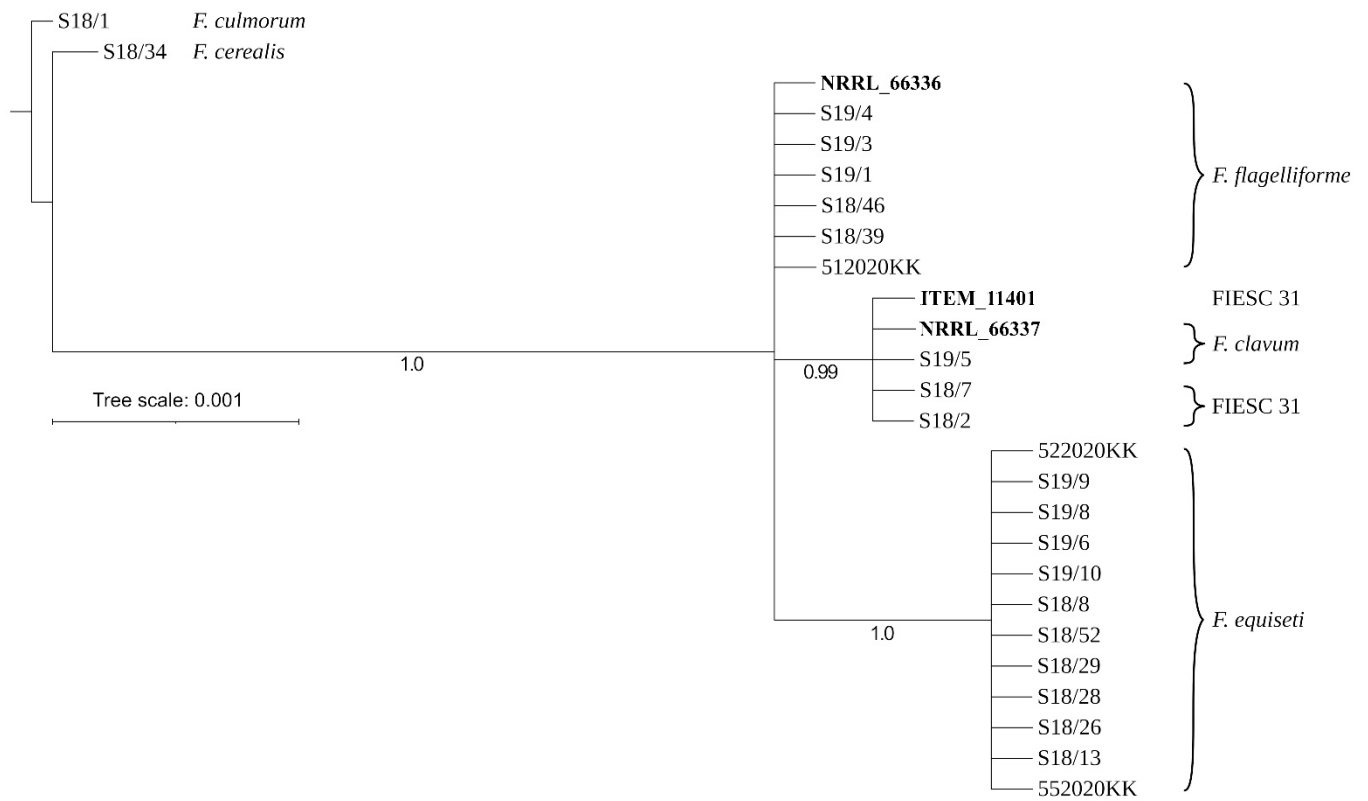

**Figure S8.** Bayesian inference phylogeny from *lsu* sequences of isolates from Equiseti clade.
